# Supplementary material for: Shedding of bevacizumab in tumour cells-derived extracellular vesicles as a new therapeutic escape mechanism in glioblastoma
Source: Mol Cancer. 2018 Aug 31;17:132. doi: 10.1186/s12943-018-0878-x (PMC6117885; doi:10.1186/s12943-018-0878-x)
Supplement: Supplementary file 4 — Supplementary Table 1. Mass spectrometry analysis of EVs content following treatment with IgG1/bevacizumab. Table 2. Mass spectrometry analysis of EVs content following treatment with IgG1/bevacizumab. (ZIP 504 kb) [file 12943_2018_878_MOESM4_ESM.zip]

Archive with 2 entries (2 files):
-  Supl. Table 1 and Table 2.pdf
- Supplementary Table 1 and Supplementary Table 2.doc
