# Supplementary material for: Shedding of bevacizumab in tumour cells-derived extracellular vesicles as a new therapeutic escape mechanism in glioblastoma
Source: Mol Cancer. 2018 Aug 31;17:132. doi: 10.1186/s12943-018-0878-x (PMC6117885; doi:10.1186/s12943-018-0878-x)
Supplement: Supplementary file 4 — Supplementary Table 1. Mass spectrometry analysis of EVs content following treatment with IgG1/bevacizumab. Table 2. Mass spectrometry analysis of EVs content following treatment with IgG1/bevacizumab. (ZIP 504 kb) [file 12943_2018_878_MOESM4_ESM.zip › Supl. Table 1 and Table 2.pdf]

Supplementary Table 1

| Control       |                          | IgG1        |                          | Bevacizumab |                          |
|---------------|--------------------------|-------------|--------------------------|-------------|--------------------------|
| MS major hits |                          |             |                          |             |                          |
| Gene symbol   | Protein accession number | Gene symbol | Protein accession number | Gene symbol | Protein accession number |
| FN1           | P02751                   | FN1         | P02751                   | FN1         | P02751                   |
| COL6A3        | P12111                   | LGALS3BP    | Q08380                   | LGALS3BP    | Q08380                   |
| LGALS3BP      | Q08380                   | IGHG1       | P01857                   | IGHG1       | P01857                   |
| COL6A1        | P12109                   | IGHG3       | P01860                   | IGHG3       | P01860                   |
| MMP2          | P08253                   | IGHG2       | P01859                   | A2M         | P01023                   |
| HSPA5         | P11021                   | IGLC2       | P0DOY2                   | COL1A1      | P02452                   |
| LAMC1         | P11047                   | IGLC1       | P0CG04                   | DCD         | P81605                   |
| COL6A2        | P12110                   | COL1A1      | P02452                   | COL6A3      | P12111                   |
| TGFB1         | Q15582                   | IGLC7       | A0M8Q8                   | C1S         | P09871                   |
| PTGFRN        | Q9P2B2                   | A2M         | P01023                   | COL1A2      | P08123                   |
| A2M           | P01023                   | C1S         | P09871                   | SHROOM3     | Q8TF72                   |
| ALB           | P02768                   | LTF         | P02788                   | BRDT        | Q58F21                   |
| C1S           | P09871                   | DST         | Q03001                   | OTUD6B      | Q8N6M0                   |
| PLOD1         | Q02809                   | COL1A2      | P08123                   | COL6A2      | P12110                   |
| APP           | P05067                   | DCD         | P81605                   | SIN3B       | Q75182                   |
| ECM1          | Q16610                   | C1R         | P00736                   | CPAMD8      | Q8IZJ3                   |
| NID2          | Q14112                   | ZC3H11A     | Q75152                   | COL6A1      | P12109                   |
| HSPA2         | P54652                   | DBF4B       | Q8NFT6                   | IGKC        | P01834                   |
| HSPA8         | P11142                   | PIN4        | Q9Y237                   | ASAP2       | Q43150                   |
| HSPA1L        | P34931                   | ATP2B3      | Q16720                   | GOLGA3      | Q08378                   |
| ITGA3         | P26006                   | SIN3B       | Q75182                   | ZC3H11A     | Q75152                   |
| C1R           | P00736                   | COL6A1      | P12109                   | CDY2A       | Q9Y6F7                   |
| HSPA1A        | P0DMV8                   | ASAP2       | Q43150                   | LTF         | P02788                   |
| HSPA6         | P17066                   | PPFIBP2     | Q8ND30                   | C1R         | P00736                   |
| PLOD3         | Q80568                   | ATP11AUN    | Q6ZP68                   | SELENBP1    | Q13228                   |
| LAMB1         | P07942                   | AHSG        | P02765                   | PDE8B       | Q95263                   |
| EDIL3         | Q43854                   | UTY         | Q14607                   | MMP2        | P08253                   |
| C1RL          | Q9NZP8                   | IGKC        | P01834                   | AHSG        | P02765                   |
| COL1A1        | P02452                   | NEIL1       | Q96F14                   | SOC98       | Q14544                   |
| PLTP          | P55058                   | AHNAK       | Q09666                   | TGFB1       | Q15582                   |
| TNC           | P24821                   | BARD1       | Q99728                   | PACS1       | Q6VY07                   |
| CD63          | P08962                   | COL6A2      | P12110                   | INADL       | Q8NI35                   |
| DST           | Q03001                   | HRNR        | Q88YZ3                   | MKL2        | Q9ULH7                   |
| NRP1          | Q14786                   | RPH3AL      | Q9UNE2                   | HADH        | Q16836                   |
| UTY           | Q14607                   | NT5DC2      | Q9H857                   | IGHG4       | P01861                   |
| CPAMD8        | Q8IZJ3                   | THNSL2      | Q86YJ6                   | PCOLCE      | Q15113                   |
| SHROOM3       | Q8TF72                   | CLIP4       | Q8N3C7                   | NEFH        | P12036                   |
| DCD           | P81605                   | APP         | P05067                   | VIM         | P08670                   |
| NT5E          | P21589                   | LAMC1       | P11047                   | MYBL2       | P10244                   |
| PRKCSH        | P14314                   | IGHG4       | P01861                   | RPS8KA8     | Q9UK32                   |
| VIM           | P08670                   | ECM1        | Q16610                   | PSAP        | P07602                   |
| ACTB          | P60709                   | SDC4        | P31431                   | SERPINC1    | P01008                   |
| ITGB1         | P05556                   | NEFH        | P12036                   | F2          | P00734                   |
| HRNR          | Q88YZ3                   | SRGN        | P10124                   | TF          | P02787                   |
| RPS27A        | P62979                   | INADL       | Q8NI35                   | ITIH2       | P19823                   |
| CSE1L         | P55060                   | C17orf53    | Q8N3J3                   | NT5E        | P21589                   |
| CDY2A         | Q9Y6F7                   | SHROOM3     | Q8TF72                   | KIF21B      | Q75037                   |
| THBS2         | P35442                   | CDY2A       | Q9Y6F7                   | LAMC1       | P11047                   |
| LTF           | P02788                   | MKL2        | Q9ULH7                   | HSPA5       | P11021                   |
| CHI3L1        | P36222                   | HADH        | Q16836                   | ACTN4       | Q43707                   |
| PCOLCE        | Q15113                   | TAF1B       | Q53T94                   | C3          | P01024                   |
| TIMP1         | P01033                   | VIM         | P08670                   | IGHG2       | P01859                   |
| CLU           | P10909                   |             |                          | C1RL        | Q9NZP8                   |
| CD82          | P27701                   |             |                          | APP         | P05067                   |
| POTEE         | Q6S8J3                   |             |                          | HSPA6       | P17066                   |
| ACTBL2        | Q562R1                   |             |                          | ANK2        | Q01484                   |
| GAPDH         | P04406                   |             |                          | TAF1B       | Q53T94                   |
| HTRA1         | Q92743                   |             |                          | IGLC2       | P0DOY2                   |
| PPIB          | P23284                   |             |                          | GAPDH       | P04406                   |
| PSMB6         | P28072                   |             |                          | CHI3L1      | P36222                   |
| YWHAG         | P61981                   |             |                          | ANXA2P2     | A6NMY6                   |
| YWHAZ         | P63104                   |             |                          | NRAP        | Q86VF7                   |
| YWHAQ         | P27348                   |             |                          | SRRM1       | Q8IYB3                   |
| YWHAB         | P31946                   |             |                          | USP17L24    | Q0WX57                   |
| YWHAE         | P62258                   |             |                          |             |                          |
| SFN           | P31947                   |             |                          |             |                          |
| YWHAH         | Q04917                   |             |                          |             |                          |
| SERPINE1      | P05121                   |             |                          |             |                          |
| COL1A2        | P08123                   |             |                          |             |                          |
| EEF1G         | P26641                   |             |                          |             |                          |
| TUBB          | P07437                   |             |                          |             |                          |
| SDCBP         | Q00560                   |             |                          |             |                          |
| ENO1          | P06733                   |             |                          |             |                          |
| CD44          | P16070                   |             |                          |             |                          |
| HBA1          | P69905                   |             |                          |             |                          |
| HBG2          | P69892                   |             |                          |             |                          |
| MYBL2         | P10244                   |             |                          |             |                          |
| PRDX1         | Q06830                   |             |                          |             |                          |
| CLEC11A       | Q9Y240                   |             |                          |             |                          |
| PDIA3         | P30101                   |             |                          |             |                          |
| TF            | P02787                   |             |                          |             |                          |
| ZBTB49        | Q6ZSB9                   |             |                          |             |                          |
| AHSG          | P02765                   |             |                          |             |                          |
| SDC4          | P31431                   |             |                          |             |                          |
| C3            | P01024                   |             |                          |             |                          |

**Supplementary Table 2**

| Control       |                          | IgG1        |                          | Bevacizumab |                          |
|---------------|--------------------------|-------------|--------------------------|-------------|--------------------------|
| M5 major hits |                          |             |                          |             |                          |
| Gene symbol   | Protein accession number | Gene symbol | Protein accession number | Gene symbol | Protein accession number |
| FN1           | P02751                   | FN1         | P02751                   | FN1         | P02751                   |
| COL6A3        | P12111                   | LGALS3BP    | Q08380                   | LGALS3BP    | Q08380                   |
| LGALS3BP      | Q08380                   | IGHG1       | P01857                   | IGHG1       | P01857                   |
| COL6A1        | P12109                   | IGHG3       | P01880                   | IGHG3       | P01880                   |
| MMP2          | P08253                   | IGHG2       | P01859                   | A2M         | P01023                   |
| HSPA5         | P11021                   | IGLC2       | P0DOY2                   | COL1A1      | P02452                   |
| LAMC1         | P11047                   | IGLC1       | P0CG04                   | DCD         | P81605                   |
| COL6A2        | P12110                   | COL1A1      | P02452                   | COL6A3      | P12111                   |
| TGFB1         | Q15582                   | IGLC7       | A0M8Q8                   | C1S         | P09871                   |
| PTGFRN        | Q9P2B2                   | A2M         | P01023                   | COL1A2      | P08123                   |
| A2M           | P01023                   | C1S         | P09871                   | SHROOM3     | Q8TF72                   |
| ALB           | P02768                   | LTF         | P02788                   | BRDT        | Q58F21                   |
| C1S           | P09871                   | DST         | Q03001                   | OTUD6B      | Q8N6M0                   |
| PLOD1         | Q02809                   | COL1A2      | P08123                   | COL6A2      | P12110                   |
| APP           | P05067                   | DCD         | P81605                   | SIN3B       | Q75182                   |
| ECM1          | Q16610                   | C1R         | P00736                   | CPAMD8      | Q8IZJ3                   |
| NID2          | Q14112                   | ZC3H11A     | Q75152                   | COL6A1      | P12109                   |
| HSPA2         | P54652                   | DBF4B       | Q8NFT6                   | IGKC        | P01834                   |
| HSPA8         | P11142                   | PIN4        | Q9Y237                   | ASAP2       | Q43150                   |
| HSPA1L        | P34931                   | ATP2B3      | Q16720                   | GOLGA3      | Q08378                   |
| ITGA3         | P26006                   | SIN3B       | Q75182                   | ZC3H11A     | Q75152                   |
| C1R           | P00736                   | COL6A1      | P12109                   | CDY2A       | Q9Y6F7                   |
| HSPA1A        | P0DMV8                   | ASAP2       | Q43150                   | LTF         | P02788                   |
| HSPA6         | P17066                   | PPFIBP2     | Q8ND30                   | C1R         | P00736                   |
| PLOD3         | Q80568                   | ATP11AUN    | Q6ZP88                   | SELENBP1    | Q13228                   |
| LAMB1         | P07942                   | AHSG        | P02765                   | PDE8B       | Q95263                   |
| EDIL3         | Q43854                   | UTY         | Q14607                   | MMP2        | P08253                   |
| C1RL          | Q9NZP8                   | IGKC        | P01834                   | AHSG        | P02765                   |
| COL1A1        | P02452                   | NEIL1       | Q96F14                   | SOC58       | Q14544                   |
| PLTP          | P55058                   | AHNAK       | Q09666                   | TGFB1       | Q15582                   |
| TNC           | P24821                   | BARD1       | Q99728                   | PACS1       | Q6VY07                   |
| CD63          | P08962                   | COL6A2      | P12110                   | INADL       | Q8NI35                   |
| DST           | Q03001                   | HRNR        | Q88YZ3                   | MKL2        | Q9ULH7                   |
| NRP1          | Q14786                   | RPH3AL      | Q9UNE2                   | HADH        | Q16836                   |
| UTY           | Q14607                   | NT5DC2      | Q9H857                   | IGHG4       | P01861                   |
| CPAMD8        | Q8IZJ3                   | THNSL2      | Q86YJ6                   | PCOLCE      | Q15113                   |
| SHROOM3       | Q8TF72                   | CLIP4       | Q8N3C7                   | NEFH        | P12036                   |
| DCD           | P81605                   | APP         | P05067                   | VIM         | P08670                   |
| NT5E          | P21589                   | LAMC1       | P11047                   | MYBL2       | P10244                   |
| PRKCSH        | P14314                   | IGHG4       | P01861                   | RPS8KA8     | Q9UK32                   |
| VIM           | P08670                   | ECM1        | Q16610                   | PSAP        | P07602                   |
| ACTB          | P60709                   | SDC4        | P31431                   | SERPINC1    | P01008                   |
| ITGB1         | P05556                   | NEFH        | P12036                   | F2          | P00734                   |
| HRNR          | Q88YZ3                   | SRGN        | P10124                   | TF          | P02787                   |
| RPS27A        | P62979                   | INADL       | Q8NI35                   | ITIH2       | P19823                   |
| CSE1L         | P55060                   | C17orf53    | Q8N3J3                   | NT5E        | P21589                   |
| CDY2A         | Q9Y6F7                   | SHROOM3     | Q8TF72                   | KIF21B      | Q75037                   |
| THBS2         | P35442                   | CDY2A       | Q9Y6F7                   | LAMC1       | P11047                   |
| LTF           | P02788                   | MKL2        | Q9ULH7                   | HSPA5       | P11021                   |
| CHI3L1        | P36222                   | HADH        | Q16836                   | ACTN4       | Q43707                   |
| PCOLCE        | Q15113                   | TAF1B       | Q53T94                   | C3          | P01024                   |
| TIMP1         | P01033                   | VIM         | P08670                   | IGHG2       | P01859                   |
| CLU           | P10909                   |             |                          | C1RL        | Q9NZP8                   |
| CD82          | P27701                   |             |                          | APP         | P05067                   |
| POTEE         | Q698J3                   |             |                          | HSPA6       | P17066                   |
| ACTBL2        | Q562R1                   |             |                          | ANK2        | Q01484                   |
| GAPDH         | P04406                   |             |                          | TAF1B       | Q53T94                   |
| HTRA1         | Q92743                   |             |                          | IGLC2       | P0DOY2                   |
| PPIB          | P23284                   |             |                          | GAPDH       | P04406                   |
| PSMB6         | P28072                   |             |                          | CHI3L1      | P36222                   |
| YWHAG         | P61981                   |             |                          | ANXA2P2     | A6NMY6                   |
| YWHAZ         | P63104                   |             |                          | NRAP        | Q86VF7                   |
| YWHAQ         | P27348                   |             |                          | SRRM1       | Q8IYB3                   |
| YWHAB         | P31946                   |             |                          | USP17L24    | Q0WX57                   |
| YWHAE         | P62258                   |             |                          |             |                          |
| SFN           | P31947                   |             |                          |             |                          |
| YWHAH         | Q04917                   |             |                          |             |                          |
| SERPINE1      | P05121                   |             |                          |             |                          |
| COL1A2        | P08123                   |             |                          |             |                          |
| EEF1G         | P26641                   |             |                          |             |                          |
| TUBB          | P07437                   |             |                          |             |                          |
| SDCBP         | Q00560                   |             |                          |             |                          |
| ENO1          | P06733                   |             |                          |             |                          |
| CD44          | P16070                   |             |                          |             |                          |
| HBA1          | P69905                   |             |                          |             |                          |
| HBG2          | P69892                   |             |                          |             |                          |
| MYBL2         | P10244                   |             |                          |             |                          |
| PRDX1         | Q06830                   |             |                          |             |                          |
| CLEC11A       | Q9Y240                   |             |                          |             |                          |
| PDIA3         | P30101                   |             |                          |             |                          |
| TF            | P02787                   |             |                          |             |                          |
| ZBTB49        | Q6ZSB9                   |             |                          |             |                          |
| AHSG          | P02765                   |             |                          |             |                          |
| SDC4          | P31431                   |             |                          |             |                          |
| C3            | P01024                   |             |                          |             |                          |
